# Supplementary material
Source: PubMed Central journal article supplement (PMC4453789)
Supplement: supp_pp.15.00321_00321suppfig3.pdf [file supp_pp.15.00321_00321suppfig3.pdf]

# Supplemental Figure S3

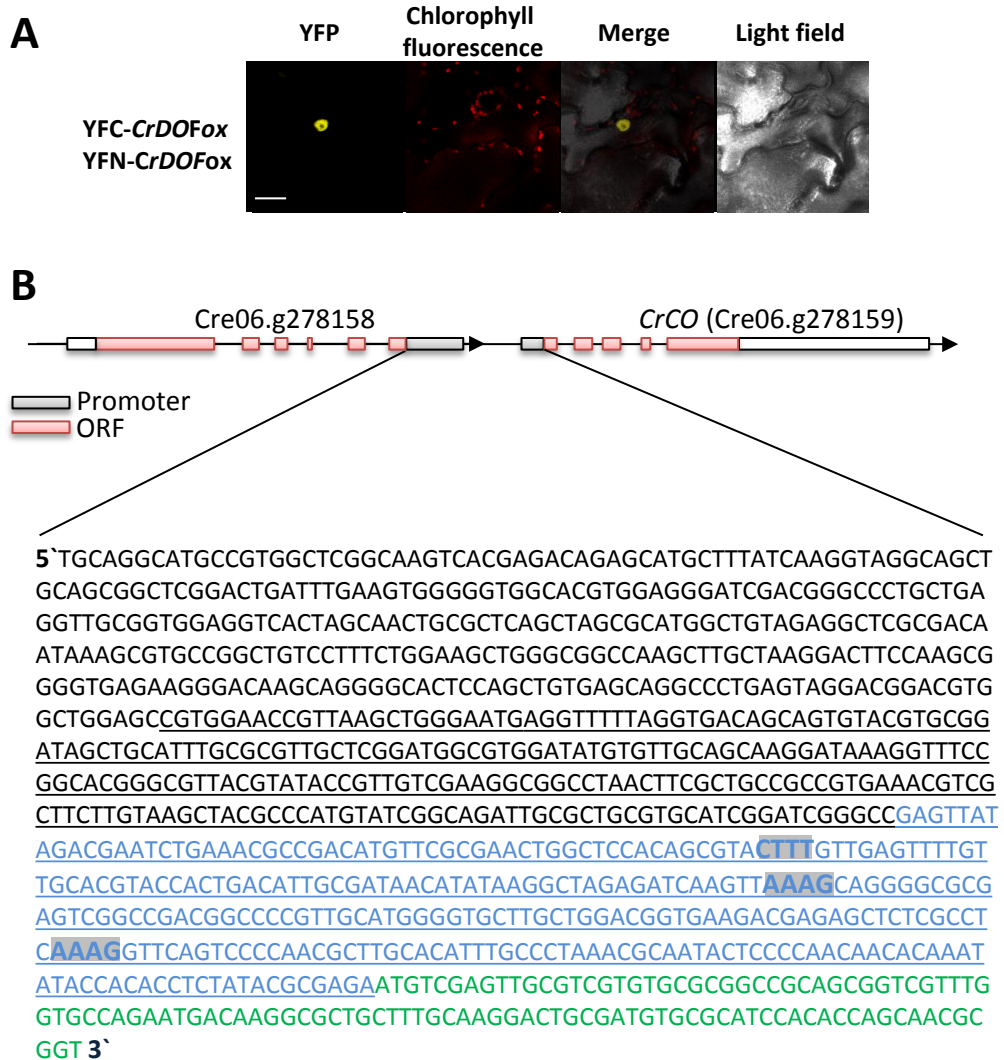

## Binding site mutations:

1. GGCTCCACAGCGTAC**CaaT**GTTGAGTTTTGTTGC (pCrCO3:GFP\*).
2. CTAGAGATCAAGTT**AttG**CAGGGGCGCGAG (pCrCO3:GFP\*\*).
3. GAGCTCTCGCCTC**AttG**GTTTCAGTCCCCA (pCrCO3:GFP\*\*\*).
