# Supplementary material
Source: PubMed Central journal article supplement (PMC4453789)
Supplement: supp_pp.15.00321_00321supptbl1.pdf [file supp_pp.15.00321_00321supptbl1.pdf]

1

2 Supplemental Table S1. *DOF* gene family in plants.

|                              | Gene Name  | Accession number          |                              | Gene Name        | Accession number |
|------------------------------|------------|---------------------------|------------------------------|------------------|------------------|
| <b><i>A. thaliana</i></b>    | AtCOG1     | At1g29160                 | <b><i>P. tricocharpa</i></b> | PtDOF5           | POPTR_0010s21240 |
|                              | AtDAG1     | At3g61850                 |                              | PtDOF6           | POPTR_0017s12080 |
|                              | AtDAG2     | At2g46590                 |                              | PtDOF8           | POPTR_0009s03490 |
|                              | AtDOF1.3   | At1g26790                 |                              | PtDOF13          | POPTR_0004s12120 |
|                              | AtDOF1.8   | At1g64620                 |                              | PtDOF14          | POPTR_0004s05580 |
|                              | AtDOF3.2   | At3g45610                 |                              | PtDOF15          | POPTR_0004s04590 |
|                              | AtDOF4.1   | At4g00940                 |                              | PtDOF16          | POPTR_0013s06290 |
|                              | AtDOF4.6   | At4g24060                 |                              | PtDOF17          | POPTR_0003s02890 |
|                              | AtDOF5.6   | At5g62940                 |                              | PtDOF18          | POPTR_0003s14450 |
|                              | AtOBP3     | At3g55370                 |                              | PtDOF20          | POPTR_0011s07400 |
|                              | AtTMO6     | At5g60200                 |                              | PtDOF21          | POPTR_0011s05410 |
|                              | CDF1       | At5g62430                 |                              | PtDOF27          | POPTR_0007s11790 |
|                              | CDF2       | At5g39660                 |                              | PtDOF32          | POPTR_0015s01160 |
|                              | CDF3       | At3g47500                 |                              | PtDOF33          | POPTR_0015s08810 |
|                              | CDF4       | At2g34140                 |                              | PtDOF37          | POPTR_0002s17490 |
| CDF5                         | At1g69570  | PtDOF38                   | POPTR_0019s05720             |                  |                  |
| <b><i>C. reinhardtii</i></b> | CrDOF      | Cre12.g521150             | PtDOF42                      | POPTR_0005s13990 |                  |
| <b><i>M. pusilla</i></b>     | MpDOF      | MpEEH5513                 | PtDOF44                      | POPTR_0014s09640 |                  |
| <b><i>O. sativa</i></b>      | OsDOF2     | Os01g15900                | PtDOF48                      | POPTR_0014s03590 |                  |
|                              | OsDOF4     | Os01g17000                | PtDOF51                      | POPTR_0008s08740 |                  |
|                              | OsDOF9     | Os02g45200                | PtDOF52                      | POPTR_0001s24540 |                  |
|                              | OsDOF12    | Os03g07360                | PtDOF57                      | POPTR_0001s11130 |                  |
|                              | OsDOF14    | Os03g16850                | PtDOF59                      | POPTR_0012s08280 |                  |
|                              | OsDOF16    | Os03g60630                | PtDOF60                      | POPTR_0012s02570 |                  |
|                              | OsDOF18    | Os04g47990                | PtDOF61                      | POPTR_0012s12670 |                  |
|                              | OsDOF21    | Os07g13260                | <b><i>V. carteri</i></b>     | VcDOF            | Vc20003744       |
|                              | OsDOF23    | Os07g48570                | ZmDOF3                       | GRMZM2G146283    |                  |
| OsDOF26                      | Os10g26620 | ZmDOF8                    | GRMZM2G463525                |                  |                  |
| <b><i>O. tauri</i></b>       | OtDOF      | Ot04g03010                | ZmDOF9                       | AC155434.2_FG006 |                  |
| <b><i>P. patens</i></b>      | PpDOF1     | Pp1s69_113V6              | ZmDOF17                      | GRMZM2G114998    |                  |
|                              | PpDOF2     | Pp1s341_43V6              | ZmDOF21                      | GRMZM2G162749    |                  |
|                              | PpDOF3     | Pp1s170_42V6              | ZmDOF23                      | GRMZM2G010290    |                  |
|                              | PpDOF4     | Pp1s124_139V6             | ZmDOF27                      | GRMZM2G017470    |                  |
|                              | PpDOF5     | Pp1s26_282V6              | ZmDOF28                      | GRMZM2G093725    |                  |
|                              | PpDOF6     | Pp1s149_180V6             | ZmDOF29                      | GRMZM2G140694    |                  |
|                              | PpDOF7     | Pp1s68_214V6              | ZmDOF36                      | GRMZM2G137502    |                  |
|                              | PpDOF8     | Pp1s169_171V6             | ZmDOF40                      | GRMZM2G138455    |                  |
|                              | PpDOF9     | Pp1s177_76V6 <sub>3</sub> | ZmDOF43                      | GRMZM2G589696    |                  |
|                              | PpDOF10    | Pp1s1_286V6 <sub>3</sub>  | ZmDOF44                      | AC233935.1_FG005 |                  |
|                              | PpDOF11    | Pp1s118_226V6             |                              |                  |                  |
|                              | PpDOF12    | Pp1s12_364V6 <sub>4</sub> |                              |                  |                  |
|                              | PpDOF13    | Pp1s199_87V6              |                              |                  |                  |
|                              | PpDOF14    | Pp1s351_46V6 <sub>5</sub> |                              |                  |                  |
|                              | PpDOF15    | Pp1s385_53V6              |                              |                  |                  |
|                              | PpDOF16    | Pp1s392_2V6 <sub>6</sub>  |                              |                  |                  |

7 The name and accession numbers of *DOF* genes from *Arabidopsis thaliana*, *Chlamydomonas reinhardtii*,  
8 *Micromonas pusilla*, *Oriza sativa*, *Ostreococcus tauri*, *Physcomitrella patens*, *Populus tricocharpa*, *Volvox carteri* and  
9 *Zea mays* used in the phylogenetic studies of this work are shown.

10
