# Supplementary material
Source: PubMed Central journal article supplement (PMC4453789)
Supplement: supp_pp.15.00321_00321supptbl2.pdf [file supp_pp.15.00321_00321supptbl2.pdf]

1

2 Supplemental Table S2. Presence of CrDOF protein complex in different conditions and  
 3 lines.

|         |         | Long Day          |        |                   |        | Short Day         |        |                   |        |
|---------|---------|-------------------|--------|-------------------|--------|-------------------|--------|-------------------|--------|
|         |         | ZT 4              |        | ZT 24             |        | ZT 4              |        | ZT 24             |        |
|         |         | Complex Size (kD) |        | Complex Size (kD) |        | Complex Size (kD) |        | Complex Size (kD) |        |
|         | MM (kD) | 464 kD            | 314 kD |
| CW15    | 100 kD  | 49.5              | 19.2   | 32.2              | 38.7   | 41.7              | 10.8   | 7.1               | 6.7    |
|         | 62 kD   | 4.8               |        |                   |        | 7.6               |        |                   |        |
| CrDOFin | 100 kD  | —                 | —      | 42.7              | 24.1   | —                 | —      | 31.2              | 2.5    |
|         | 62 kD   | —                 | —      | 6.2               | 0.6    | —                 | —      | 3.4               | 0.9    |

4

5 The presence and absence of the complex including CrDOF in two consecutive fractions (#8 and #9) of the gel-  
 6 filtration column (Supplemental Fig. 2C-D) are shown. Both CW15 and CrDOFin lines in LD and SD conditions were  
 7 analysed and the molecular mass (MM) in kD, annotated. The presence of the 100 kD and 60 kD bands is shown  
 8 including an estimated quantitation: Maximum (red), medium (orange and yellow) and minimum (pale yellow) amount  
 9 of protein. Not detected protein (white); not analysed (-).

10

11
