# Supplementary material
Source: PubMed Central journal article supplement (PMC4453789)
Supplement: supp_pp.15.00321_00321supptbl3.pdf [file supp_pp.15.00321_00321supptbl3.pdf]

1

## Supplemental Table S3. Primers used in QPCR amplifications.

| <i>Chlamydomonas</i><br>Genes | Sequence                                                             | Size (bp) |
|-------------------------------|----------------------------------------------------------------------|-----------|
| <i>CrDOF</i>                  | 5'- GTCGTCTGGCAGCTACGC -3'<br>5'- CACCTAGCACCCGAGTAAGC -3'           | 70        |
| <i>CrCO</i>                   | 5'- CTTCCCGCAAGGCGTATGC -3'<br>5'- GCCTCAATCTCCTCCTTCTGGC -3'        | 73        |
| <i>CrCYCA1</i>                | 5'- CGGCATTCACCGCTCGTGAG -3'<br>5'- AGCGTCATGTACGATAGCGTGG -3'       | 145       |
| <i>CrCDKB1</i>                | 5'- GGATAAGGTGACCGTGGACGC -3'<br>5'- AGACTTCGCACCCTTGCACG -3'        | 149       |
| <i>CrTUB</i>                  | 5'- GTTGCATCGTTAGCGTGGACG -3'<br>5'- GCAGCAGCCAATGTTTCAGACT -3'      | 170       |
| <i>Arabidopsis</i><br>Genes   | Sequence                                                             | Size (bp) |
| <i>CO</i>                     | 5'- CCAATGGACAGAGAAGCCAGG -3<br>5'- GCATCGTGTGAACCCTTGC -3'          | 70        |
| <i>FT</i>                     | 5'- CGAACGGTGATGATGCCTATAGTAG -3'<br>5'- CACTCTCATTTTCTCCCCCTCTC -3' | 73        |
| <i>UBQ10</i>                  | 5'- GAAGTTCAATGTTTCGTTTCATGT -3'<br>5'- GGATTATACAAGGCCCAAAA -3'     | 145       |

2

3
