# Supplementary material
Source: PubMed Central journal article supplement (PMC4453789)

# Supplemental Figure S1

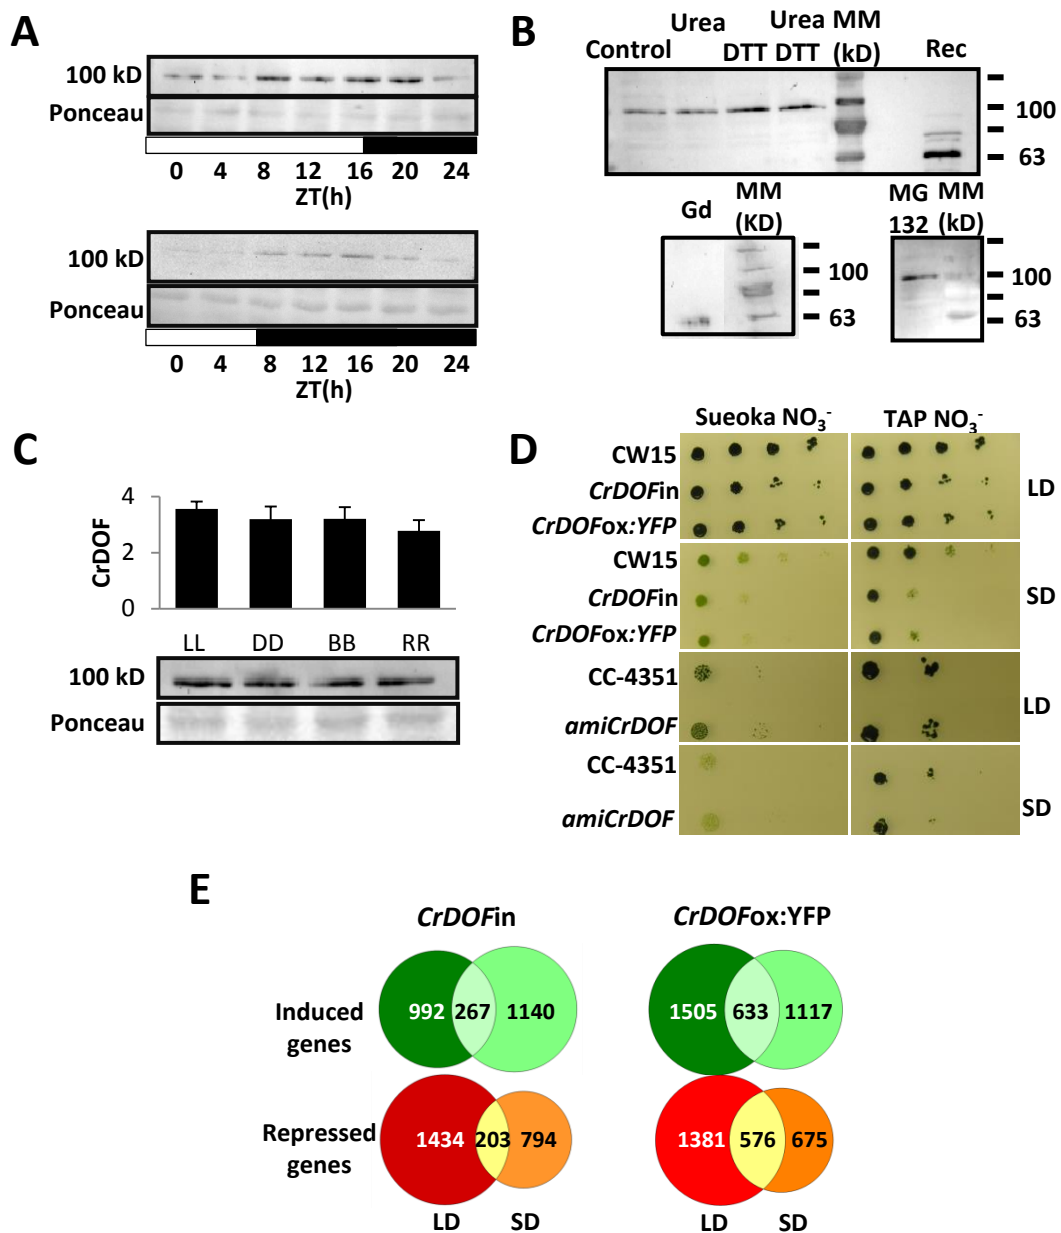

Supplement: supp_pp.15.00321_00321suppfig1.pdf [file supp_pp.15.00321_00321suppfig1.pdf]

# Supplemental Figure S2

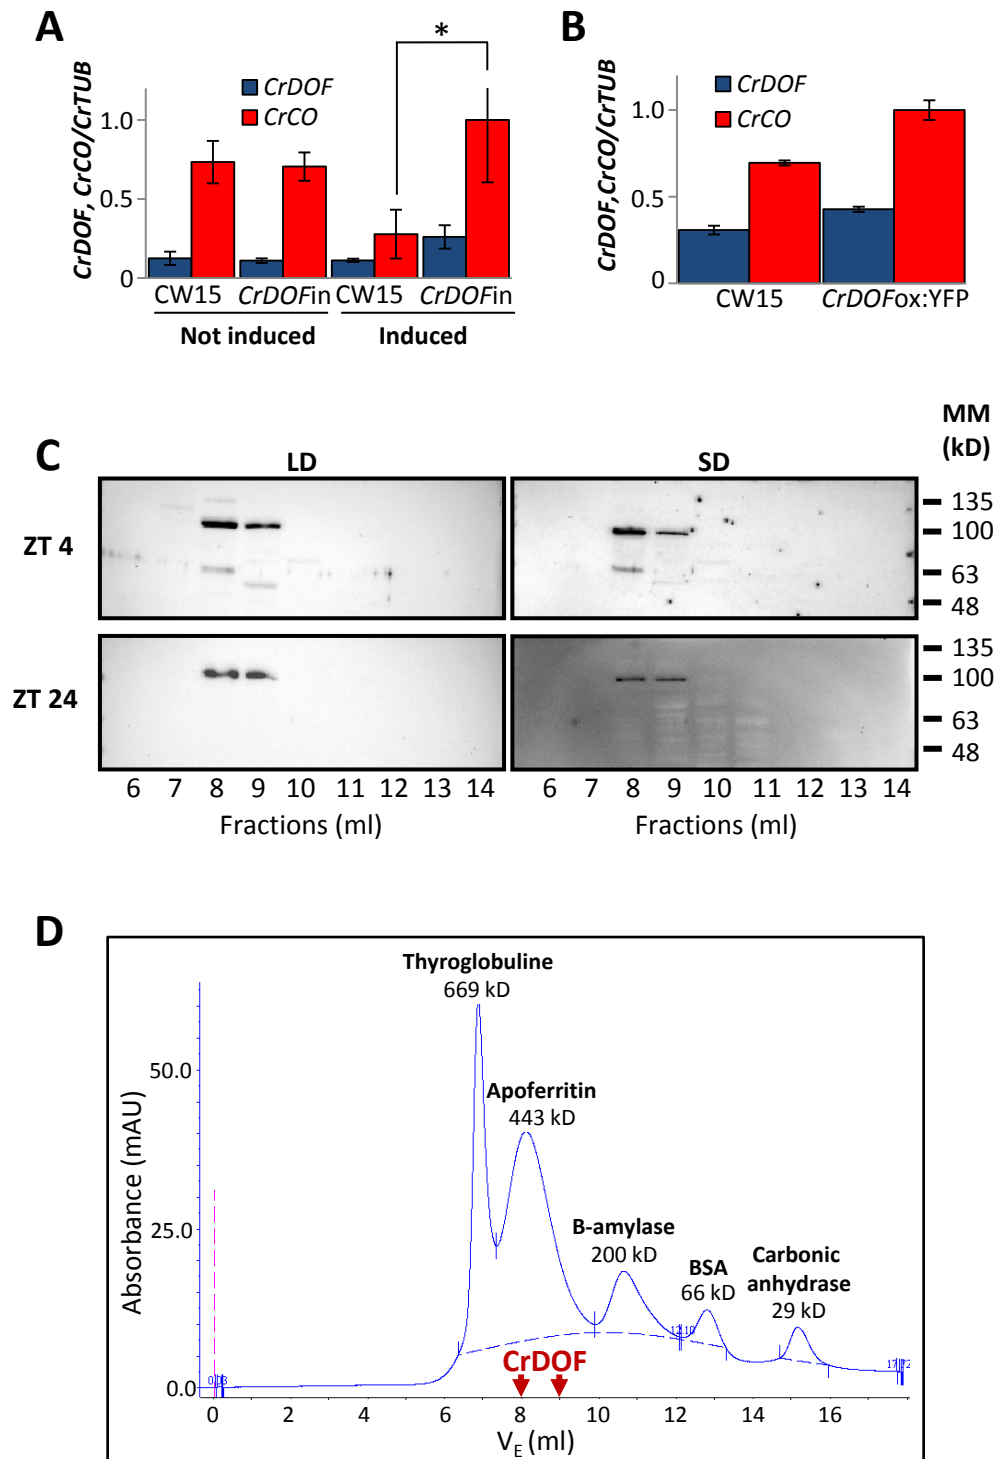

Supplement: supp_pp.15.00321_00321suppfig2.pdf [file supp_pp.15.00321_00321suppfig2.pdf]

Supplemental Figure S4

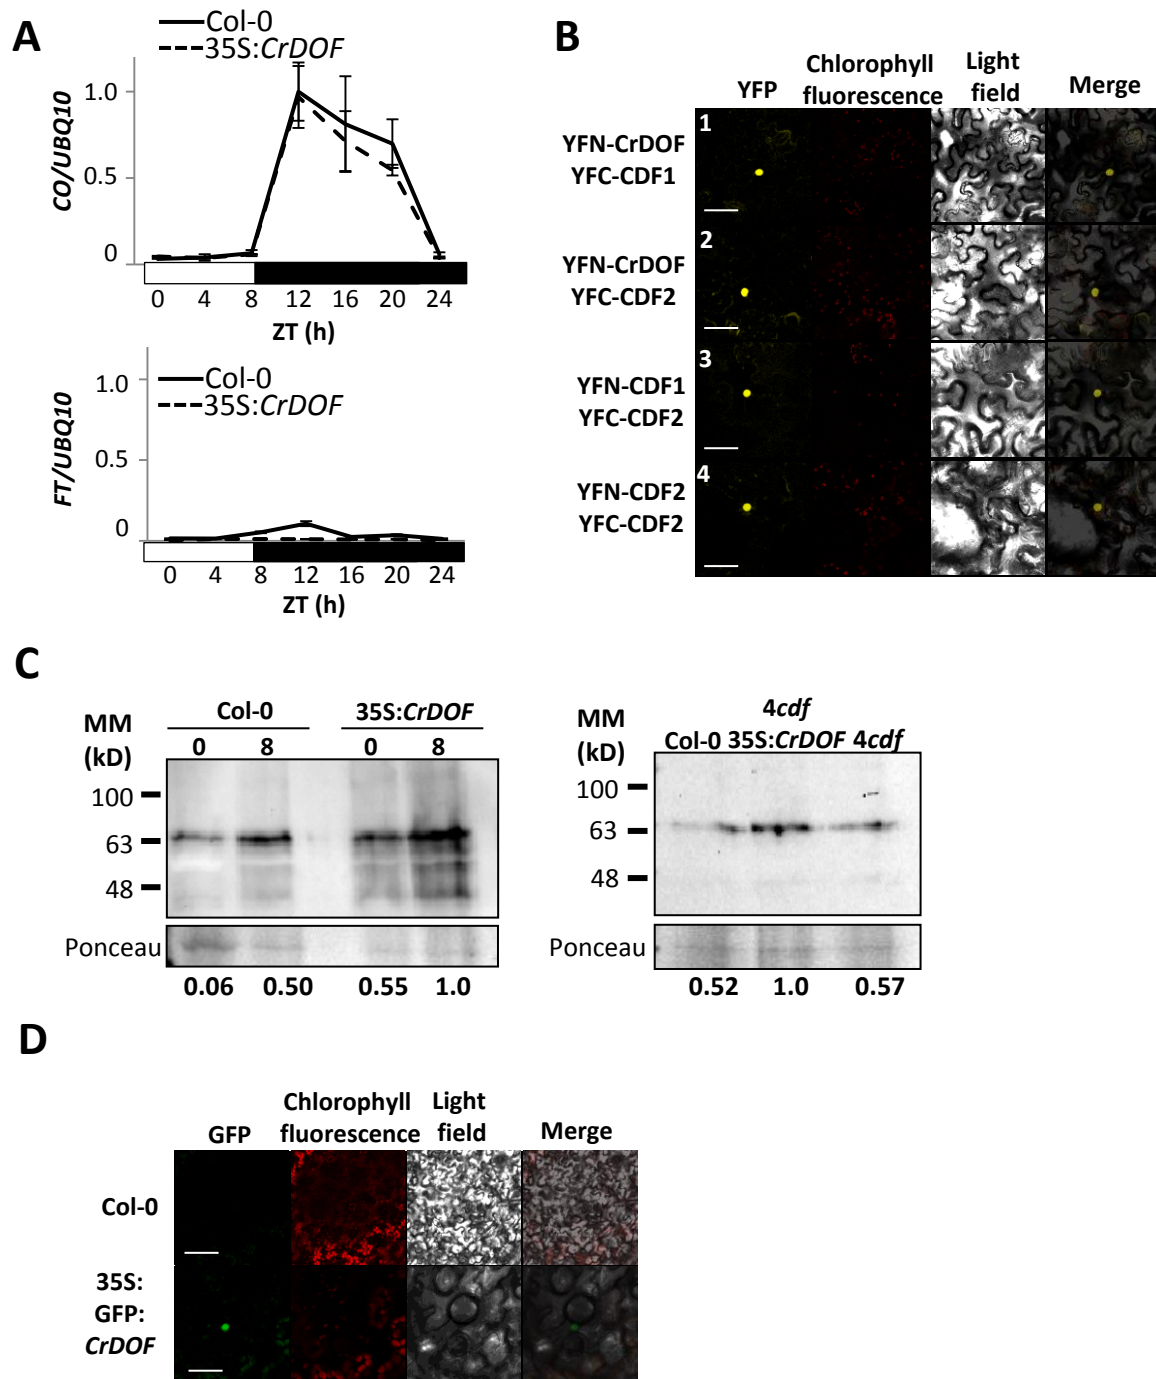

Supplement: supp_pp.15.00321_00321suppfig4.pdf [file supp_pp.15.00321_00321suppfig4.pdf]
